# Supplementary material for: Exploration of a diversity of computational and statistical measures of association for genome-wide genetic studies
Source: BioData Min. 2019 Jul 9;12:14. doi: 10.1186/s13040-019-0201-4 (PMC6617598; doi:10.1186/s13040-019-0201-4)
Supplement: Supplementary file 6 — BPC3 pruned top 200-union. BPC3 pruned top-200 union, sorted by decreasing extraction number followed by increasing average position. For each SNP in this list, its extraction number and average position in the ranking are indicated. For each approach, a 0 indicates that the SNP was not in the top 200, a non-zero value occurs if the SNP was in the top 200 and indicates how well the SNP ranks with 200 being the best ranking and 1 the worst. (XLSX 56 kb) [file 13040_2019_201_MOESM6_ESM.xlsx]

## Sheet: u_200
SNP	extractionNum	avgPos	leap	mdr.ba	entropy	plink.add	plink.dom	plink.model.best.perm	plink.rec	dec.tree	plink.model.dom
rs17789629	7	91.4286	0	11	182	195	43	175	135	0	26
rs488541	7	91.4286	19	166	148	72	36	164	0	0	162
rs7635061	6	5.66667	0	200	193	185	200	196	0	0	198
rs2218891	6	14.8333	0	199	173	169	197	185	0	0	194
rs9344208	6	20.3333	0	197	182	140	173	195	0	0	197
rs10039101	6	24	0	177	196	106	184	200	0	0	199
rs9277052	6	26.1667	0	183	160	168	179	169	0	0	190
rs7211306	6	28.5	0	181	148	190	193	151	0	0	172
rs7199614	6	32	0	149	160	198	188	166	0	0	153
rs987951	6	36.5	0	190	117	159	199	142	0	0	180
rs8043332	6	37.1667	0	191	148	127	190	146	0	0	181
rs4706478	6	40.6667	0	160	148	186	194	114	0	0	160
rs13188993	6	44.6667	0	176	148	139	175	129	0	0	171
rs10217099	6	44.8333	200	0	200	82	55	200	0	0	200
rs17530068	6	44.8333	0	188	148	105	152	160	0	0	184
rs7642228	6	45.3333	0	178	117	144	182	135	0	0	178
rs131056	6	46.1667	0	181	182	153	57	182	0	0	174
rs1483749	6	50	0	49	190	200	92	195	180	0	0
rs1000294	6	50.8333	0	174	117	123	187	130	0	0	170
rs2378384	6	52.5	0	176	117	179	185	80	0	0	154
rs11882959	6	57.1667	130	85	190	108	0	195	0	0	155
rs10500510	6	59.6667	0	105	148	191	136	137	0	0	131
rs7213057	6	63	0	183	148	7	183	132	0	0	175
rs6439132	6	69.3333	0	172	86	124	142	105	0	0	161
rs850145	6	70	0	126	117	192	117	138	0	0	96
rs6503915	6	72.5	0	168	86	35	180	134	0	0	168
rs10149826	6	80.6667	132	59	160	0	3	182	0	0	186
rs850086	6	86.6667	0	146	48	161	106	98	0	0	127
rs4789773	6	89.6667	0	156	11	89	177	94	0	0	141
rs3804583	6	104	0	69	86	55	155	66	0	0	151
rs10456700	6	107.833	0	162	48	32	83	89	0	0	145
rs10505554	6	116.333	0	11	11	88	162	97	0	0	139
rs6780199	6	118.333	0	41	86	180	58	121	0	0	10
rs10492994	6	125.167	0	152	11	11	123	23	0	0	135
rs11624218	6	129.667	0	105	11	131	95	33	0	0	53
rs2297594	5	4.2	0	0	196	199	196	198	0	0	195
rs7982644	5	12.2	0	0	173	196	195	191	0	0	189
rs6101230	5	23.4	135	0	198	0	0	178	177	200	0
rs2924250	5	23.6	0	172	190	0	156	178	0	0	191
rs6998112	5	24.8	0	0	148	193	189	178	0	0	173
rs11771719	5	27.4	0	188	148	0	186	159	0	0	187
rs6801242	5	28.8	0	0	199	76	0	197	194	195	0
rs1431793	5	31.8	0	198	182	0	99	174	0	0	193
rs4410821	5	34.2	0	188	148	0	160	153	0	0	185
rs7775523	5	35	0	195	160	0	130	157	0	0	188
rs11683197	5	36.4	0	192	173	0	126	149	0	0	183
rs1624675	5	36.4	0	132	160	0	150	189	0	0	192
rs913670	5	41.8	0	188	148	0	137	146	0	0	177
rs2427652	5	44.2	0	130	190	135	0	187	0	0	142
rs17569415	5	49.8	0	195	182	0	31	169	0	0	179
rs1862896	5	52.2	0	0	148	151	116	163	0	0	166
rs315644	5	57.2	0	162	148	0	101	139	0	0	169
rs2716889	5	62.6	0	0	86	164	157	127	0	0	158
rs7829491	5	64.4	143	0	117	0	0	155	0	140	128
rs10867395	5	77	0	138	0	156	191	5	0	0	130
rs12811509	5	77.4	0	0	86	99	141	128	0	0	164
rs862989	5	77.6	0	168	86	0	81	115	0	0	167
rs261966	5	81.2	90	0	182	118	0	185	24	0	0
rs17196752	5	88.6	0	0	160	188	17	161	0	0	36
rs12746015	5	88.8	0	97	182	58	0	182	0	0	42
rs10825066	5	91	0	121	86	133	0	119	0	0	91
rs1399790	5	94	0	41	86	0	129	122	0	0	157
rs11777084	5	95.4	0	91	0	158	148	28	0	0	103
rs6063500	5	96.2	0	159	86	0	63	73	0	0	143
rs6828137	5	100	0	85	48	0	135	90	0	0	147
rs6503235	5	100.6	0	97	86	121	0	123	0	0	75
rs6427053	5	102.2	0	11	11	162	198	0	0	0	112
rs11028434	5	104.6	0	59	86	0	111	76	0	0	150
rs2623630	5	105.2	0	146	48	78	0	81	0	0	126
rs7002677	5	108.8	0	146	48	0	103	42	0	0	122
rs13427257	5	123	10	142	48	0	0	52	0	0	138
rs10086940	5	132.8	0	105	11	15	0	104	0	0	106
rs12131391	5	141.2	0	121	11	41	0	55	0	0	71
rs11126021	5	142.4	0	20	48	0	91	24	0	0	110
rs7314038	4	9	0	0	193	0	0	190	193	192	0
rs6020391	4	10.75	0	0	198	170	0	195	198	0	0
rs17158577	4	34.5	0	0	117	0	0	157	196	196	0
rs263350	4	44.75	0	0	182	165	0	136	142	0	0
rs7859870	4	46	0	0	117	0	0	141	187	175	0
rs1900221	4	52.5	106	0	190	0	0	182	116	0	0
rs7149265	4	60.25	0	0	173	21	0	169	200	0	0
rs6122894	4	65.75	0	0	148	172	0	72	149	0	0
rs2113616	4	66.25	0	0	196	31	0	131	181	0	0
rs17025827	4	67.75	0	0	86	0	0	101	148	198	0
rs6651385	4	73.5	0	134	0	86	174	0	0	0	116
rs7519168	4	73.75	0	149	117	0	0	111	0	0	132
rs4887870	4	77.75	64	179	173	0	0	0	0	0	77
rs984438	4	77.75	56	0	190	84	0	163	0	0	0
rs17250061	4	80.5	0	126	0	85	154	0	0	0	117
rs2320432	4	80.75	0	0	0	155	192	30	0	0	104
rs1326298	4	87.25	0	121	0	62	153	0	0	0	119
rs1026349	4	89.5	0	59	0	146	163	0	0	0	78
rs17138455	4	92.25	0	85	86	0	0	108	0	0	156
rs4723866	4	96.25	0	97	0	0	181	26	0	0	115
rs1501562	4	106.25	0	69	117	0	0	124	0	0	69
rs7178775	4	109	0	0	86	0	71	65	0	0	146
rs13112011	4	111	0	0	0	130	127	15	0	0	88
rs1255523	4	112.75	0	41	0	109	133	0	0	0	70
rs1957015	4	113.5	0	69	86	0	0	62	0	0	133
rs1675273	4	117	0	105	11	0	0	71	0	0	149
rs10952516	4	128.5	0	0	86	33	0	99	0	0	72
rs7831467	4	129.25	196	11	11	0	0	69	0	0	0
rs927239	4	130.75	0	117	11	0	44	0	0	0	109
rs7980716	4	132.5	0	11	0	0	109	31	0	0	123
rs1783575	4	145.25	0	97	11	0	0	10	0	0	105
rs3808593	4	146.25	0	0	0	111	4	43	0	0	61
rs2922806	4	147.75	0	0	86	100	0	22	5	0	0
rs11048342	4	160.75	0	0	11	17	0	47	0	0	86
rs156005	4	166	0	0	48	4	0	79	0	0	9
rs10486269	4	177	0	0	48	18	0	17	13	0	0
rs1570089	3	12.6667	0	0	190	0	0	186	189	0	0
rs9371331	3	16.3333	0	0	190	0	0	174	190	0	0
rs992474	3	22.6667	0	0	173	0	0	170	192	0	0
rs13230035	3	35.3333	0	0	148	183	0	166	0	0	0
rs12587244	3	37	0	0	148	0	0	147	197	0	0
rs2276102	3	41	0	0	148	0	0	158	174	0	0
rs6436196	3	41	0	0	148	0	0	149	183	0	0
rs7323986	3	43.3333	0	0	160	167	0	146	0	0	0
rs9380895	3	44.3333	0	0	148	0	0	153	169	0	0
rs11563419	3	54.3333	0	0	117	178	0	0	145	0	0
rs1992632	3	56	0	0	117	0	0	133	185	0	0
rs4717457	3	63	0	0	160	0	178	0	0	0	76
rs728611	3	70	0	0	117	0	0	92	184	0	0
rs1039636	3	72	0	0	117	0	0	91	179	0	0
rs1877480	3	73.6667	155	0	117	0	0	110	0	0	0
rs438129	3	74.6667	0	0	117	0	0	126	136	0	0
rs1039755	3	81.3333	0	0	86	173	0	100	0	0	0
rs4361456	3	83.6667	0	0	86	0	0	95	171	0	0
rs897090	3	83.6667	0	153	173	0	26	0	0	0	0
rs7643638	3	84.3333	0	159	117	0	74	0	0	0	0
rs10011134	3	88	49	0	173	0	0	117	0	0	0
rs7689639	3	89	0	0	86	0	0	0	68	182	0
rs6719412	3	90	0	142	117	0	0	0	74	0	0
rs12652833	3	90.6667	0	0	0	0	0	75	182	74	0
rs7852109	3	91.6667	0	0	148	0	0	116	64	0	0
rs11249024	3	95.3333	0	0	117	0	0	50	0	150	0
rs6414950	3	95.6667	112	0	117	0	0	87	0	0	0
rs16977079	3	100	0	69	0	0	145	0	0	0	89
rs11638855	3	101.333	0	0	117	69	0	113	0	0	0
rs10257280	3	102.667	0	0	0	0	0	61	103	131	0
rs13027825	3	104.667	0	136	0	0	0	40	0	0	113
rs305347	3	107.667	0	0	48	0	0	96	0	0	136
rs2301301	3	109.333	0	142	0	0	0	12	0	0	121
rs2866904	3	109.667	0	117	0	0	78	0	0	0	79
rs10076867	3	110	0	0	117	44	0	112	0	0	0
rs3793543	3	110	129	49	0	0	0	0	0	0	95
rs1298129	3	116	0	134	0	0	0	1	0	0	120
rs6794124	3	116.333	120	89	0	0	0	0	0	0	45
rs17562125	3	117	0	127	0	0	24	0	0	0	101
rs1076620	3	119	0	0	117	0	49	0	0	0	80
rs2967320	3	119	0	0	86	0	0	83	77	0	0
rs801540	3	119.333	0	41	0	0	121	0	0	0	83
rs1170695	3	123	0	130	11	0	0	0	0	0	93
rs80724	3	123	0	0	0	54	167	0	0	0	13
rs10887583	3	123.333	0	0	11	0	0	78	0	0	144
rs12492596	3	124	0	0	0	0	0	58	44	129	0
rs589400	3	124	0	110	0	66	0	0	0	0	55
rs6049705	3	124.333	0	85	0	0	0	21	0	0	124
rs3776221	3	125.667	0	0	48	0	0	61	117	0	0
rs1007368	3	127.333	0	0	0	0	69	38	0	0	114
rs616488	3	130.333	0	0	48	125	0	39	0	0	0
rs7310279	3	130.333	7	0	160	0	0	45	0	0	0
rs13290974	3	133.667	113	0	0	0	0	48	0	0	41
rs607941	3	135.667	0	75	0	83	0	0	0	0	38
rs12714409	3	139.667	0	0	11	0	79	0	0	0	94
rs9341324	3	140	0	27	0	0	98	0	0	0	58
rs11884056	3	140.333	0	0	11	0	0	53	0	0	118
rs12740054	3	143.667	77	0	11	0	0	84	0	0	0
rs4910293	3	146.667	0	0	11	0	0	27	0	0	125
rs380978	3	149	0	0	11	0	0	8	137	0	0
rs6564656	3	149	58	75	0	0	0	0	0	0	23
rs10100405	3	149.667	0	11	0	0	124	0	0	0	19
rs911028	3	151.333	0	0	11	0	0	11	127	0	0
rs10932737	3	157	0	41	0	0	31	0	0	0	60
rs12519617	3	158.333	0	75	0	0	22	0	0	0	31
rs7640654	3	159.667	0	0	11	0	47	0	0	0	66
rs12732599	3	169.667	0	0	11	0	0	59	0	0	24
rs11106374	3	182	0	0	11	0	0	36	10	0	0
rs4712572	3	182.667	0	11	0	0	0	14	0	0	30
rs233966	2	18	0	193	173	0	0	0	0	0	0
rs16877056	2	30	0	0	0	0	0	0	156	186	0
rs12197582	2	35	0	0	0	171	161	0	0	0	0
rs11198846	2	39	0	0	0	160	164	0	0	0	0
rs1020567	2	40.5	0	173	148	0	0	0	0	0	0
rs7607940	2	43.5	0	0	0	0	0	0	126	189	0
rs4234183	2	48.5	0	0	0	0	0	0	143	162	0
rs1041238	2	49	0	0	0	132	172	0	0	0	0
rs1324521	2	51	0	0	0	0	0	0	110	190	0
rs4523491	2	57	0	0	0	175	113	0	0	0	0
rs2268086	2	60	0	0	0	96	0	0	186	0	0
rs8058203	2	60.5	0	0	0	0	0	0	84	197	0
rs236346	2	63.5	0	0	0	157	118	0	0	0	0
rs12200607	2	65	0	0	0	129	143	0	0	0	0
rs242017	2	66	0	0	0	182	88	0	0	0	0
rs1465552	2	67	0	0	0	0	0	0	94	174	0
rs2858458	2	67.5	0	0	0	174	93	0	0	0	0
rs236371	2	69.5	0	0	0	187	76	0	0	0	0
rs6142050	2	73.5	0	0	0	79	0	0	176	0	0
rs17367154	2	74.5	0	0	0	0	151	0	0	0	102
rs10739231	2	75	0	166	86	0	0	0	0	0	0
rs12622309	2	76.5	0	138	0	0	0	0	0	0	111
rs1986155	2	77.5	0	0	0	122	125	0	0	0	0
rs6803646	2	80	0	0	48	0	0	0	0	194	0
rs2348553	2	80.5	0	0	148	0	0	93	0	0	0
rs9888659	2	82	0	0	86	152	0	0	0	0	0
rs2277454	2	84	0	0	0	95	139	0	0	0	0
rs4403487	2	84	0	0	0	120	114	0	0	0	0
rs6136453	2	85.5	0	0	0	0	169	0	0	0	62
rs2714864	2	87.5	0	130	0	0	0	0	0	0	97
rs1013439	2	89	0	0	48	0	0	0	0	176	0
rs6538968	2	90.5	0	75	0	0	146	0	0	0	0
rs2371816	2	91	0	0	0	166	54	0	0	0	0
rs6911727	2	92	0	170	48	0	0	0	0	0	0
rs11126162	2	94.5	0	0	193	0	0	0	0	0	20
rs4405161	2	95	0	0	0	0	0	54	158	0	0
rs4864905	2	95.5	0	0	0	147	64	0	0	0	0
rs1805958	2	98	0	0	0	137	69	0	0	0	0
rs589610	2	99.5	0	155	48	0	0	0	0	0	0
rs17739179	2	101	67	0	0	0	0	0	0	133	0
rs4680881	2	101.5	0	151	48	0	0	0	0	0	0
rs4374829	2	102	166	0	0	0	0	32	0	0	0
rs719525	2	102.5	0	0	0	0	0	0	81	116	0
rs2147002	2	103	0	0	0	0	0	58	138	0	0
rs6753182	2	105	0	0	0	0	0	0	120	72	0
rs831017	2	105	0	0	0	0	176	0	0	0	16
rs7278856	2	107	0	0	86	0	0	0	102	0	0
rs12964295	2	109	0	0	0	0	0	0	67	117	0
rs7572996	2	109	0	0	0	97	87	0	0	0	0
rs6558511	2	109.5	0	75	0	0	0	0	0	0	108
rs6065998	2	111.5	0	0	0	25	0	0	154	0	0
rs873053	2	112.5	0	110	0	0	0	0	0	0	67
rs12478240	2	113.5	0	110	0	0	0	0	0	0	65
rs664850	2	115.5	0	0	0	98	73	0	0	0	0
rs1555133	2	116.5	0	105	0	0	0	0	0	0	64
rs200705	2	117	0	0	86	0	0	82	0	0	0
rs4876534	2	118.5	0	0	0	0	0	0	20	145	0
rs12759463	2	121	0	0	86	0	0	74	0	0	0
rs4863381	2	121	0	149	11	0	0	0	0	0	0
rs9383938	2	121	0	0	0	115	45	0	0	0	0
rs1406304	2	122	0	0	117	0	0	41	0	0	0
rs12427378	2	122.5	146	0	11	0	0	0	0	0	0
rs9964679	2	122.5	0	146	11	0	0	0	0	0	0
rs1145123	2	124	0	0	86	0	0	68	0	0	0
rs1289466	2	124.5	0	0	0	93	60	0	0	0	0
rs4662124	2	125	0	0	0	138	14	0	0	0	0
rs923994	2	126	0	0	0	28	122	0	0	0	0
rs531117	2	127	0	49	0	0	0	0	0	0	99
rs16867	2	129	0	0	11	0	0	0	133	0	0
rs9434662	2	129.5	0	0	0	0	0	13	130	0	0
rs12337802	2	131	115	0	0	0	0	0	0	0	25
rs10820444	2	132.5	0	0	0	0	0	0	19	118	0
rs10986271	2	132.5	0	89	48	0	0	0	0	0	0
rs7849404	2	132.5	0	0	0	0	0	37	0	0	100
rs4490524	2	133	0	0	48	0	0	88	0	0	0
rs4623759	2	133	0	0	0	0	104	0	0	0	32
rs1565256	2	133.5	0	0	11	0	0	0	124	0	0
rs1257333	2	134	0	0	0	94	40	0	0	0	0
rs1361265	2	134	0	0	0	107	0	0	27	0	0
rs1874828	2	135.5	0	0	0	0	0	2	129	0	0
rs12211307	2	137.5	0	0	0	104	23	0	0	0	0
rs7667423	2	144	0	0	48	0	0	0	66	0	0
rs10798724	2	145	0	0	48	0	0	64	0	0	0
rs17743926	2	148	0	0	48	0	0	0	58	0	0
rs624912	2	148	0	20	86	0	0	0	0	0	0
rs12769679	2	150	0	0	0	77	0	25	0	0	0
rs4861352	2	152	0	0	0	0	0	0	35	63	0
rs398593	2	153.5	0	0	48	0	0	0	47	0	0
rs1832548	2	156.5	0	41	48	0	0	0	0	0	0
rs2163039	2	157	0	11	0	0	77	0	0	0	0
rs12765932	2	157.5	0	75	0	0	0	0	0	0	12
rs1330106	2	159	0	69	0	0	0	0	0	0	15
rs6761357	2	160.5	0	59	0	0	0	0	0	0	22
rs949637	2	161	0	0	0	51	29	0	0	0	0
rs11077554	2	162.5	0	59	0	0	0	0	0	0	18
rs10981910	2	163	0	59	0	0	0	0	0	0	17
rs10514448	2	163.5	48	27	0	0	0	0	0	0	0
rs12377675	2	166	0	0	0	0	42	0	0	0	28
rs4650450	2	166	0	59	11	0	0	0	0	0	0
rs2936548	2	167	0	0	0	0	0	18	0	0	50
rs3108140	2	167	0	41	0	0	27	0	0	0	0
rs4930600	2	170	0	0	11	0	0	51	0	0	0
rs2309389	2	172	0	0	0	0	9	0	0	0	49
rs6911696	2	174	0	0	11	0	0	0	43	0	0
rs4132466	2	174.5	0	0	0	0	52	0	0	0	1
rs9821289	2	174.5	18	0	0	0	0	35	0	0	0
rs517205	2	180	0	0	11	0	0	0	0	31	0
rs243903	2	186	0	0	11	0	0	19	0	0	0
rs6679064	2	186	0	27	0	0	0	0	0	0	3
rs9513774	2	187.5	0	0	11	0	0	16	0	0	0
rs1903927	2	189	0	20	0	0	0	4	0	0	0
rs10788251	1	2	0	0	0	0	0	0	0	199	0
rs4954218	1	2	199	0	0	0	0	0	0	0	0
rs12203592	1	3	198	0	0	0	0	0	0	0	0
rs17382675	1	4	197	0	0	0	0	0	0	0	0
rs17153747	1	6	195	0	0	0	0	0	0	0	0
rs10487995	1	7	194	0	0	0	0	0	0	0	0
rs17273267	1	8	193	0	0	0	0	0	0	0	0
rs313519	1	9	192	0	0	0	0	0	0	0	0
rs3110601	1	10	0	0	0	0	0	0	0	191	0
rs2164210	1	11	190	0	0	0	0	0	0	0	0
rs309160	1	12	189	0	0	0	0	0	0	0	0
rs10509116	1	13	0	0	0	0	0	0	0	188	0
rs876056	1	13	188	0	0	0	0	0	0	0	0
rs6740091	1	14	187	0	0	0	0	0	0	0	0
rs9919066	1	14	0	0	0	0	0	0	0	187	0
rs1912881	1	17	0	0	0	0	0	0	0	184	0
rs2730350	1	17	0	0	0	184	0	0	0	0	0
rs4796059	1	17	184	0	0	0	0	0	0	0	0
rs749873	1	18	183	0	0	0	0	0	0	0	0
rs9627893	1	18	0	0	0	0	0	0	0	183	0
rs878456	1	19	182	0	0	0	0	0	0	0	0
rs10512283	1	20	181	0	0	0	0	0	0	0	0
rs4841511	1	20	0	0	0	0	0	0	0	181	0
rs4982014	1	21	0	0	0	0	0	0	0	180	0
rs2211552	1	22	0	0	0	0	0	0	0	179	0
rs11929741	1	23	0	0	0	0	0	0	0	178	0
rs7037931	1	23	178	0	0	0	0	0	0	0	0
rs2859523	1	24	0	0	0	0	0	0	0	177	0
rs4497400	1	24	177	0	0	0	0	0	0	0	0
rs6088316	1	24	0	0	0	177	0	0	0	0	0
rs1983503	1	25	176	0	0	0	0	0	0	0	0
rs10264820	1	26	175	0	0	0	0	0	0	0	0
rs7156426	1	26	0	0	0	0	0	0	175	0	0
rs11244591	1	27	174	0	0	0	0	0	0	0	0
rs133528	1	28	0	0	173	0	0	0	0	0	0
rs17208592	1	28	0	0	0	0	0	0	0	173	0
rs881754	1	28	173	0	0	0	0	0	0	0	0
rs11986238	1	29	0	0	0	0	0	0	0	172	0
rs2347889	1	29	172	0	0	0	0	0	0	0	0
rs17020649	1	30	171	0	0	0	0	0	0	0	0
rs414964	1	30	0	0	0	0	0	0	0	171	0
rs11224188	1	31	0	0	0	0	0	0	0	170	0
rs2532083	1	31	0	0	0	0	170	0	0	0	0
rs11787063	1	32	169	0	0	0	0	0	0	0	0
rs316058	1	32	0	0	0	0	0	0	0	169	0
rs11724644	1	33	0	0	0	0	0	0	168	0	0
rs2282343	1	33	0	0	0	0	0	0	0	168	0
rs4764112	1	33	0	0	0	0	168	0	0	0	0
rs10873077	1	34	0	0	0	0	0	0	0	167	0
rs4958556	1	35	0	0	0	0	0	0	0	166	0
rs7141756	1	35	0	0	0	0	0	0	166	0	0
rs4641958	1	36	165	0	0	0	0	0	0	0	0
rs7538216	1	36	0	0	0	0	165	0	0	0	0
rs2688513	1	37	0	0	0	0	0	0	0	164	0
rs10069222	1	38	0	0	0	163	0	0	0	0	0
rs11898149	1	38	0	0	0	0	0	0	0	163	0
rs2479106	1	38	163	0	0	0	0	0	0	0	0
rs336526	1	38	0	0	0	0	0	0	163	0	0
rs13165786	1	39	0	0	0	0	0	0	162	0	0
rs7042939	1	39	162	0	0	0	0	0	0	0	0
rs10231759	1	40	0	0	0	0	0	0	161	0	0
rs17504837	1	40	161	0	0	0	0	0	0	0	0
rs7185824	1	40	0	0	0	0	0	0	0	161	0
rs12773500	1	41	160	0	0	0	0	0	0	0	0
rs17034538	1	41	0	0	160	0	0	0	0	0	0
rs17282759	1	41	0	0	0	0	0	0	0	160	0
rs252215	1	41	0	0	160	0	0	0	0	0	0
rs4774966	1	41	0	0	0	0	0	0	160	0	0
rs17712690	1	42	159	0	0	0	0	0	0	0	0
rs1952337	1	42	0	0	0	0	0	0	159	0	0
rs12462192	1	43	0	0	0	0	0	0	158	0	0
rs17788590	1	43	0	0	0	0	0	0	0	158	0
rs622200	1	43	158	0	0	0	0	0	0	0	0
rs12672105	1	44	0	0	0	0	0	0	0	157	0
rs7962484	1	44	157	0	0	0	0	0	0	0	0
rs13089851	1	45	156	0	0	0	0	0	0	0	0
rs3135761	1	45	0	0	0	0	0	0	0	156	0
rs12703318	1	46	0	0	0	0	0	0	0	155	0
rs9605317	1	46	0	0	0	0	0	0	155	0	0
rs12615012	1	47	154	0	0	0	0	0	0	0	0
rs4903668	1	47	0	0	0	0	0	0	0	154	0
rs6126407	1	47	0	0	0	0	0	0	154	0	0
rs674430	1	47	0	0	0	154	0	0	0	0	0
rs7018307	1	48	0	0	0	0	0	0	0	153	0
rs1221934	1	49	0	0	0	0	0	0	152	0	0
rs6477717	1	49	152	0	0	0	0	0	0	0	0
rs9558663	1	49	0	0	0	0	0	0	0	152	0
rs13065952	1	50	151	0	0	0	0	0	0	0	0
rs16832740	1	51	150	0	0	0	0	0	0	0	0
rs17609699	1	52	0	0	0	0	0	0	0	149	0
rs1927605	1	52	149	0	0	0	0	0	0	0	0
rs7826624	1	52	0	0	0	149	0	0	0	0	0
rs12118376	1	53	0	0	148	0	0	0	0	0	0
rs1514748	1	53	0	0	148	0	0	0	0	0	0
rs4796513	1	53	0	0	0	0	0	0	0	148	0
rs9471554	1	53	0	0	148	0	0	0	0	0	0
rs2245937	1	54	147	0	0	0	0	0	0	0	0
rs3743175	1	54	0	0	0	0	0	0	0	147	0
rs7048389	1	54	0	0	0	0	0	0	0	147	0
rs7668666	1	54	0	0	0	0	0	0	147	0	0
rs12706247	1	55	0	0	0	0	0	0	146	0	0
rs12779373	1	57	144	0	0	0	0	0	0	0	0
rs2244529	1	57	0	0	0	0	0	0	144	0	0
rs6486453	1	58	0	0	0	0	0	0	0	143	0
rs10017098	1	59	0	0	0	0	0	0	142	0	0
rs2572432	1	60	141	0	0	0	0	0	0	0	0
rs7638044	1	60	0	0	0	0	0	0	0	141	0
rs12348146	1	61	0	0	0	0	0	0	140	0	0
rs3213943	1	61	140	0	0	0	0	0	0	0	0
rs10888923	1	62	0	0	0	0	0	0	0	139	0
rs32037	1	62	0	0	0	0	0	0	139	0	0
rs10486537	1	63	0	0	0	0	0	0	0	138	0
rs10492061	1	63	138	0	0	0	0	0	0	0	0
rs11579463	1	63	0	0	0	0	138	0	0	0	0
rs13226509	1	64	137	0	0	0	0	0	0	0	0
rs7267617	1	64	0	0	0	0	0	0	0	137	0
rs1561574	1	65	0	0	0	0	0	0	0	136	0
rs16876914	1	66	0	0	0	0	0	0	0	135	0
rs875861	1	66	0	0	0	0	135	0	0	0	0
rs10021529	1	67	0	0	0	0	0	0	0	134	0
rs4675141	1	67	0	0	0	0	0	0	134	0	0
rs6802797	1	67	134	0	0	0	0	0	0	0	0
rs6586923	1	69	0	0	0	0	0	0	132	0	0
rs673358	1	69	0	0	0	0	0	0	0	132	0
rs7810927	1	69	0	132	0	0	0	0	0	0	0
rs9536928	1	69	0	0	0	0	132	0	0	0	0
rs13129848	1	70	131	0	0	0	0	0	0	0	0
rs2406739	1	70	0	0	0	0	0	0	131	0	0
rs12511290	1	71	0	0	0	0	0	0	0	130	0
rs11740286	1	73	0	0	0	0	0	0	0	128	0
rs12205967	1	74	0	0	0	0	0	0	0	127	0
rs7189538	1	74	127	0	0	0	0	0	0	0	0
rs12634559	1	75	0	126	0	0	0	0	0	0	0
rs13274659	1	75	0	0	0	126	0	0	0	0	0
rs16876434	1	75	126	0	0	0	0	0	0	0	0
rs362271	1	75	0	126	0	0	0	0	0	0	0
rs4991791	1	75	0	0	0	0	0	0	0	126	0
rs6784399	1	75	0	126	0	0	0	0	0	0	0
rs10487592	1	76	125	0	0	0	0	0	0	0	0
rs17000522	1	76	0	0	0	0	0	0	0	125	0
rs7873626	1	76	0	0	0	0	0	0	125	0	0
rs6061336	1	77	0	0	0	0	0	0	0	124	0
rs11032686	1	78	0	0	0	0	0	0	0	123	0
rs2290650	1	78	123	0	0	0	0	0	0	0	0
rs4312793	1	78	0	0	0	0	0	0	123	0	0
rs12599734	1	79	0	0	0	0	0	0	0	122	0
rs10489286	1	80	0	0	0	0	0	0	121	0	0
rs548216	1	80	121	0	0	0	0	0	0	0	0
rs12598653	1	81	0	0	0	0	0	0	0	120	0
rs602159	1	81	0	0	0	0	120	0	0	0	0
rs17055448	1	82	0	0	0	0	0	0	0	119	0
rs551185	1	82	119	0	0	0	0	0	0	0	0
rs633727	1	82	0	0	0	0	0	0	119	0	0
rs3780429	1	83	118	0	0	0	0	0	0	0	0
rs6810768	1	83	0	0	0	0	0	0	118	0	0
rs12628984	1	84	0	117	0	0	0	0	0	0	0
rs2247608	1	84	0	117	0	0	0	0	0	0	0
rs378716	1	84	0	0	117	0	0	0	0	0	0
rs6050664	1	84	117	0	0	0	0	0	0	0	0
rs7619284	1	84	0	117	0	0	0	0	0	0	0
rs672413	1	85	0	0	0	0	0	0	116	0	0
rs8043070	1	86	0	0	0	0	0	0	0	115	0
rs11037390	1	87	0	0	0	0	0	0	0	114	0
rs6588636	1	87	0	0	0	0	0	0	114	0	0
rs2894094	1	88	0	0	0	0	0	0	113	0	0
rs3780605	1	88	0	0	0	113	0	0	0	0	0
rs654526	1	88	0	0	0	0	0	0	0	113	0
rs12662332	1	89	0	0	0	0	0	0	0	112	0
rs1524143	1	89	0	0	0	0	0	0	112	0	0
rs3742966	1	89	0	0	0	0	112	0	0	0	0
rs13218604	1	90	0	0	0	0	0	0	111	0	0
rs2038936	1	90	0	0	0	0	0	0	0	111	0
rs971256	1	90	111	0	0	0	0	0	0	0	0
rs13408761	1	91	0	0	0	0	0	0	0	110	0
rs2112075	1	91	110	0	0	0	0	0	0	0	0
rs2250232	1	91	0	0	0	0	110	0	0	0	0
rs7924679	1	91	0	0	0	110	0	0	0	0	0
rs2151414	1	92	0	0	0	0	0	0	109	0	0
rs4702374	1	92	109	0	0	0	0	0	0	0	0
rs6740617	1	92	0	0	0	0	0	0	0	109	0
rs11255106	1	93	0	0	0	0	0	0	0	108	0
rs1221932	1	93	0	0	0	0	0	0	108	0	0
rs7868945	1	93	108	0	0	0	0	0	0	0	0
rs2195610	1	94	107	0	0	0	0	0	0	0	0
rs4810899	1	94	0	0	0	0	107	0	0	0	0
rs9855853	1	94	0	0	0	0	0	0	0	107	0
rs2863098	1	95	0	0	0	0	0	0	106	0	0
rs716520	1	95	0	0	0	0	0	0	0	106	0
rs12777323	1	96	0	105	0	0	0	0	0	0	0
rs1568632	1	96	0	0	0	0	0	0	0	105	0
rs17352781	1	96	0	0	0	0	105	0	0	0	0
rs650783	1	96	105	0	0	0	0	0	0	0	0
rs10739155	1	97	0	0	0	0	0	0	104	0	0
rs2983500	1	97	0	0	0	0	0	0	0	104	0
rs16973990	1	98	0	0	0	0	0	0	0	103	0
rs236388	1	98	0	0	0	103	0	0	0	0	0
rs3815076	1	99	0	0	0	0	0	0	0	102	0
rs4750016	1	99	0	0	0	0	0	0	0	102	0
rs6863510	1	99	102	0	0	0	0	0	0	0	0
rs9914971	1	99	0	0	0	0	102	0	0	0	0
rs674608	1	100	0	0	0	0	0	0	101	0	0
rs11074171	1	101	0	0	0	0	0	0	100	0	0
rs2834778	1	101	0	0	0	0	100	0	0	0	0
rs7216660	1	101	0	0	0	0	0	0	0	100	0
rs4811206	1	102	0	0	0	0	0	0	0	0	99
rs7259026	1	102	0	0	0	0	0	0	0	99	0
rs8036290	1	102	0	0	0	0	0	0	99	0	0
rs918808	1	102	99	0	0	0	0	0	0	0	0
rs6430600	1	103	98	0	0	0	0	0	0	0	0
rs6962246	1	103	0	0	0	0	0	0	98	0	0
rs7243931	1	103	0	0	0	0	0	0	0	98	0
rs1281159	1	104	97	0	0	0	0	0	0	0	0
rs7568887	1	104	0	0	0	0	0	0	97	0	0
rs10492879	1	105	0	0	0	0	0	0	0	96	0
rs3808149	1	105	0	0	0	0	0	0	96	0	0
rs7299159	1	105	0	0	0	0	96	0	0	0	0
rs7943730	1	105	96	0	0	0	0	0	0	0	0
rs10429356	1	106	0	0	0	0	0	0	0	95	0
rs1383361	1	106	95	0	0	0	0	0	0	0	0
rs606215	1	106	0	0	0	0	0	0	95	0	0
rs11840723	1	107	0	0	0	0	0	0	0	94	0
rs13006092	1	107	94	0	0	0	0	0	0	0	0
rs870957	1	107	0	0	0	0	94	0	0	0	0
rs11629242	1	108	0	0	0	0	0	0	93	0	0
rs4797425	1	108	0	0	0	0	0	0	0	93	0
rs13015399	1	109	0	0	0	0	0	0	0	92	0
rs7904311	1	109	0	0	0	92	0	0	0	0	0
rs11133331	1	110	0	0	0	91	0	0	0	0	0
rs11763228	1	110	0	0	0	0	0	0	91	0	0
rs1980867	1	110	0	0	0	0	0	0	0	91	0
rs6744417	1	110	91	0	0	0	0	0	0	0	0
rs9393089	1	110	0	91	0	0	0	0	0	0	0
rs10492029	1	111	0	0	0	90	0	0	0	0	0
rs4640856	1	111	0	0	0	0	0	0	90	0	0
rs1533885	1	112	0	89	0	0	0	0	0	0	0
rs2053025	1	112	0	0	0	0	0	0	0	89	0
rs293561	1	112	89	0	0	0	0	0	0	0	0
rs7750826	1	112	0	0	0	0	0	0	89	0	0
rs9789571	1	112	0	89	0	0	0	0	0	0	0
rs10202039	1	113	88	0	0	0	0	0	0	0	0
rs1567230	1	113	0	0	0	0	0	0	0	88	0
rs12773693	1	114	0	0	0	0	0	0	0	87	0
rs261752	1	114	0	0	0	0	0	0	87	0	0
rs6119879	1	114	87	0	0	0	0	0	0	0	0
rs10485692	1	115	0	0	86	0	0	0	0	0	0
rs193772	1	115	0	0	86	0	0	0	0	0	0
rs4684862	1	115	0	0	86	0	0	0	0	0	0
rs807043	1	115	0	0	86	0	0	0	0	0	0
rs9688048	1	115	0	0	0	0	0	0	0	86	0
rs12695186	1	116	0	85	0	0	0	0	0	0	0
rs1522279	1	116	0	0	0	0	0	0	0	0	85
rs2129327	1	116	0	85	0	0	0	0	0	0	0
rs2930154	1	116	0	85	0	0	0	0	0	0	0
rs6450953	1	116	0	85	0	0	0	0	0	0	0
rs6846038	1	116	0	85	0	0	0	0	0	0	0
rs758072	1	116	0	0	0	0	0	0	0	85	0
rs7982637	1	116	85	0	0	0	0	0	0	0	0
rs883853	1	116	0	0	0	0	0	0	85	0	0
rs13003177	1	117	0	0	0	0	0	0	0	0	84
rs7207214	1	117	84	0	0	0	0	0	0	0	0
rs10460880	1	118	0	0	0	0	0	0	0	83	0
rs561285	1	118	0	0	0	0	0	0	83	0	0
rs6531266	1	118	83	0	0	0	0	0	0	0	0
rs10985963	1	119	82	0	0	0	0	0	0	0	0
rs13116794	1	119	0	0	0	0	0	0	82	0	0
rs1739808	1	119	0	0	0	0	82	0	0	0	0
rs2505390	1	119	0	0	0	0	0	0	0	82	0
rs10490969	1	120	0	0	0	0	0	0	0	0	81
rs1472941	1	120	0	0	0	0	0	0	0	81	0
rs2251761	1	120	81	0	0	0	0	0	0	0	0
rs10132198	1	121	0	0	0	0	0	0	0	80	0
rs12360303	1	121	80	0	0	0	0	0	0	0	0
rs1885560	1	121	0	0	0	0	0	0	80	0	0
rs3753534	1	121	0	0	0	0	80	0	0	0	0
rs12218075	1	122	0	0	0	0	0	0	0	79	0
rs4348778	1	122	0	0	0	0	0	0	79	0	0
rs6872996	1	122	79	0	0	0	0	0	0	0	0
rs1561937	1	123	0	0	0	0	0	0	0	78	0
rs2020202	1	123	0	0	0	0	0	0	78	0	0
rs2250786	1	123	78	0	0	0	0	0	0	0	0
rs10821183	1	124	0	0	0	0	0	0	0	77	0
rs4718560	1	124	0	0	0	0	0	0	0	77	0
rs7629234	1	124	0	0	0	0	0	0	0	77	0
rs41461	1	125	0	0	0	0	0	0	76	0	0
rs7857196	1	125	76	0	0	0	0	0	0	0	0
rs10928050	1	126	0	0	0	0	75	0	0	0	0
rs1533458	1	126	75	0	0	0	0	0	0	0	0
rs7870439	1	126	0	0	0	0	0	0	75	0	0
rs1427683	1	127	74	0	0	0	0	0	0	0	0
rs1036499	1	128	0	0	0	0	0	0	0	73	0
rs9789183	1	128	0	0	0	0	0	0	73	0	0
rs1028005	1	129	72	0	0	0	0	0	0	0	0
rs6434538	1	129	0	0	0	0	0	0	72	0	0
rs12663522	1	130	0	0	0	71	0	0	0	0	0
rs1453245	1	130	0	0	0	0	0	0	0	71	0
rs1890546	1	130	71	0	0	0	0	0	0	0	0
rs4257390	1	130	0	0	0	0	0	0	71	0	0
rs11071494	1	131	0	0	0	0	0	0	0	70	0
rs1464158	1	131	0	0	0	70	0	0	0	0	0
rs858940	1	131	70	0	0	0	0	0	0	0	0
rs912116	1	131	0	0	0	0	0	0	70	0	0
rs10509109	1	132	0	0	0	0	0	0	69	0	0
rs1056616	1	132	0	0	0	0	0	0	0	69	0
rs1160615	1	132	69	0	0	0	0	0	0	0	0
rs2307325	1	132	0	69	0	0	0	0	0	0	0
rs628634	1	132	0	69	0	0	0	0	0	0	0
rs1113384	1	133	68	0	0	0	0	0	0	0	0
rs13115041	1	133	0	0	0	0	0	0	0	0	68
rs16852689	1	133	0	0	0	0	0	0	0	68	0
rs751998	1	133	0	0	0	68	0	0	0	0	0
rs10931934	1	134	0	0	0	0	67	0	0	0	0
rs1868302	1	134	0	0	0	0	0	0	0	67	0
rs10490745	1	135	0	0	0	0	0	0	0	66	0
rs11672654	1	136	65	0	0	0	0	0	0	0	0
rs17101375	1	136	0	0	0	0	0	0	0	65	0
rs2921452	1	136	0	0	0	0	0	0	65	0	0
rs661891	1	136	0	0	0	65	0	0	0	0	0
rs9693804	1	136	0	0	0	0	65	0	0	0	0
rs10212632	1	137	0	0	0	64	0	0	0	0	0
rs3808234	1	138	63	0	0	0	0	0	0	0	0
rs9350206	1	138	0	0	0	63	0	0	0	0	0
rs10498677	1	139	0	0	0	0	0	0	62	0	0
rs12379316	1	139	0	0	0	0	62	0	0	0	0
rs17789193	1	139	62	0	0	0	0	0	0	0	0
rs3741089	1	139	0	0	0	62	0	0	0	0	0
rs9261285	1	139	0	0	0	0	0	0	0	62	0
rs9952987	1	139	0	0	0	0	0	0	0	62	0
rs11123246	1	141	0	0	0	0	0	0	60	0	0
rs17169573	1	141	0	0	0	60	0	0	0	0	0
rs7032894	1	141	0	0	0	0	0	0	0	60	0
rs10040899	1	142	0	0	0	0	0	0	59	0	0
rs1009769	1	142	0	59	0	0	0	0	0	0	0
rs3001719	1	142	0	0	0	59	0	0	0	0	0
rs9376454	1	142	59	0	0	0	0	0	0	0	0
rs1405040	1	143	0	0	0	0	0	0	0	58	0
rs3750490	1	144	0	0	0	0	0	0	0	0	57
rs7875079	1	144	0	0	0	0	0	0	57	0	0
rs7910211	1	144	57	0	0	0	0	0	0	0	0
rs990527	1	144	0	0	0	0	0	0	0	57	0
rs12465514	1	145	0	0	0	0	0	0	56	0	0
rs12704756	1	145	0	0	0	0	56	0	0	0	0
rs2242645	1	145	0	0	0	0	0	0	0	0	56
rs2962271	1	145	0	0	0	0	0	0	0	56	0
rs11632854	1	146	0	0	0	0	0	0	0	55	0
rs7850520	1	146	55	0	0	0	0	0	0	0	0
rs11111055	1	147	0	0	0	0	0	0	0	54	0
rs16999322	1	147	54	0	0	0	0	0	0	0	0
rs4931471	1	147	0	0	0	0	0	0	0	0	54
rs1075834	1	148	0	0	0	0	0	0	0	53	0
rs218669	1	148	0	0	0	0	0	0	53	0	0
rs7828977	1	148	53	0	0	0	0	0	0	0	0
rs12702586	1	149	52	0	0	0	0	0	0	0	0
rs2060885	1	149	0	0	0	0	0	0	0	52	0
rs7160374	1	149	0	0	0	0	0	0	0	0	52
rs8023613	1	149	0	0	0	0	0	0	52	0	0
rs2413980	1	150	51	0	0	0	0	0	0	0	0
rs4148797	1	150	0	0	0	0	0	0	51	0	0
rs6021775	1	150	0	0	0	0	51	0	0	0	0
rs13169820	1	151	0	0	0	50	0	0	0	0	0
rs4668634	1	151	50	0	0	0	0	0	0	0	0
rs4923429	1	151	0	0	0	0	0	0	0	50	0
rs11235770	1	152	0	0	0	0	0	0	49	0	0
rs2056509	1	152	0	49	0	0	0	0	0	0	0
rs4719188	1	152	0	0	0	0	0	0	0	49	0
rs608636	1	152	0	49	0	0	0	0	0	0	0
rs7089504	1	152	0	0	0	49	0	0	0	0	0
rs9449868	1	152	0	49	0	0	0	0	0	0	0
rs10442600	1	153	0	0	48	0	0	0	0	0	0
rs11978935	1	153	0	0	48	0	0	0	0	0	0
rs12507320	1	153	0	0	48	0	0	0	0	0	0
rs12931063	1	153	0	0	48	0	0	0	0	0	0
rs1332183	1	153	0	0	0	48	0	0	0	0	0
rs1541957	1	153	0	0	0	0	0	0	0	48	0
rs1562250	1	153	0	0	48	0	0	0	0	0	0
rs17649067	1	153	0	0	48	0	0	0	0	0	0
rs239794	1	153	0	0	0	0	0	0	0	0	48
rs373695	1	153	0	0	48	0	0	0	0	0	0
rs4808611	1	153	0	0	0	0	48	0	0	0	0
rs4939800	1	153	0	0	0	0	0	0	0	48	0
rs584803	1	153	0	0	48	0	0	0	0	0	0
rs7419344	1	153	0	0	48	0	0	0	0	0	0
rs7988671	1	153	0	0	48	0	0	0	0	0	0
rs10498472	1	155	46	0	0	0	0	0	0	0	0
rs2978314	1	155	0	0	0	0	0	0	46	0	0
rs498100	1	155	0	0	0	0	0	0	0	46	0
rs9527209	1	155	0	0	0	0	46	0	0	0	0
rs2239710	1	156	0	0	0	45	0	0	0	0	0
rs4147051	1	156	0	0	0	0	0	0	0	45	0
rs4669869	1	156	0	0	0	0	0	0	45	0	0
rs4709090	1	156	45	0	0	0	0	0	0	0	0
rs4749554	1	157	0	0	0	0	0	0	0	0	44
rs7200376	1	157	44	0	0	0	0	0	0	0	0
rs940415	1	157	0	0	0	0	0	0	0	44	0
rs13381806	1	158	0	0	0	0	0	0	0	43	0
rs2110743	1	158	0	0	0	0	0	0	0	0	43
rs2505765	1	158	0	0	0	43	0	0	0	0	0
rs712450	1	158	43	0	0	0	0	0	0	0	0
rs1431330	1	159	0	0	0	0	0	0	42	0	0
rs1549064	1	159	42	0	0	0	0	0	0	0	0
rs42372	1	159	0	0	0	0	0	0	42	0	0
rs9328347	1	159	0	0	0	0	0	0	0	42	0
rs16961113	1	160	0	41	0	0	0	0	0	0	0
rs236377	1	160	0	0	0	0	41	0	0	0	0
rs6115039	1	160	0	0	0	0	0	0	0	41	0
rs6841955	1	160	0	41	0	0	0	0	0	0	0
rs744166	1	160	0	41	0	0	0	0	0	0	0
rs958648	1	160	41	0	0	0	0	0	0	0	0
rs9945360	1	160	0	41	0	0	0	0	0	0	0
rs1680481	1	161	0	0	0	0	0	0	0	40	0
rs4728755	1	161	40	0	0	0	0	0	0	0	0
rs7724302	1	161	0	0	0	40	0	0	0	0	0
rs7766672	1	161	0	0	0	0	0	0	40	0	0
rs10970923	1	162	0	0	0	0	0	0	0	39	0
rs4245096	1	162	0	0	0	0	0	0	0	0	39
rs4392869	1	162	0	0	0	39	0	0	0	0	0
rs4879930	1	162	39	0	0	0	0	0	0	0	0
rs6061231	1	162	0	0	0	0	0	0	39	0	0
rs10505943	1	163	0	0	0	0	0	0	0	38	0
rs10948102	1	163	0	0	0	0	0	0	38	0	0
rs11786247	1	163	0	0	0	38	0	0	0	0	0
rs16885494	1	163	0	0	0	0	38	0	0	0	0
rs17579256	1	163	38	0	0	0	0	0	0	0	0
rs10414009	1	164	0	0	0	0	0	0	37	0	0
rs1467831	1	164	0	0	0	37	0	0	0	0	0
rs16857038	1	164	0	0	0	0	37	0	0	0	0
rs283438	1	164	0	0	0	0	0	0	0	0	37
rs6809559	1	164	0	0	0	0	0	0	0	37	0
rs13384377	1	165	0	0	0	0	0	0	0	36	0
rs2299514	1	165	0	0	0	0	0	0	36	0	0
rs356982	1	165	0	0	0	36	0	0	0	0	0
rs2288367	1	166	0	0	0	0	0	0	0	35	0
rs6801942	1	166	0	0	0	0	0	0	0	0	35
rs11187400	1	167	34	0	0	0	0	0	0	0	0
rs11688042	1	167	0	0	0	0	0	0	0	0	34
rs12643937	1	167	0	0	0	0	0	0	0	34	0
rs7590991	1	167	0	0	0	34	0	0	0	0	0
rs889725	1	167	0	0	0	0	0	0	34	0	0
rs10916260	1	168	0	0	0	0	0	0	33	0	0
rs11790363	1	168	0	0	0	0	0	0	0	33	0
rs12964135	1	168	0	0	0	0	0	0	0	33	0
rs670719	1	168	0	0	0	0	33	0	0	0	0
rs7040080	1	168	33	0	0	0	0	0	0	0	0
rs12500263	1	169	0	0	0	0	0	0	32	0	0
rs741720	1	169	32	0	0	0	0	0	0	0	0
rs7904011	1	169	0	0	0	0	32	0	0	0	0
rs12347952	1	170	0	0	0	0	0	0	0	31	0
rs2820439	1	170	0	0	0	0	0	0	31	0	0
rs4981166	1	170	0	0	0	0	0	0	0	31	0
rs9307350	1	170	31	0	0	0	0	0	0	0	0
rs12541064	1	171	0	0	0	0	0	0	30	0	0
rs573556	1	171	0	0	0	30	0	0	0	0	0
rs10472795	1	172	0	0	0	0	0	0	29	0	0
rs17640246	1	172	29	0	0	0	0	0	0	0	0
rs10495317	1	173	0	0	0	0	0	0	0	28	0
rs17050529	1	173	0	0	0	0	28	0	0	0	0
rs7129066	1	173	0	0	0	0	0	0	28	0	0
rs12706389	1	174	0	0	0	0	0	0	0	27	0
rs17136898	1	174	0	0	0	27	0	0	0	0	0
rs4878368	1	174	27	0	0	0	0	0	0	0	0
rs750927	1	174	0	27	0	0	0	0	0	0	0
rs11228346	1	175	0	0	0	0	0	0	0	26	0
rs10495475	1	176	0	0	0	0	25	0	0	0	0
rs17820808	1	176	25	0	0	0	0	0	0	0	0
rs3808814	1	176	0	0	0	0	0	0	0	25	0
rs2211134	1	177	0	0	0	0	0	0	0	24	0
rs2252534	1	177	24	0	0	0	0	0	0	0	0
rs718564	1	177	0	0	0	24	0	0	0	0	0
rs10516032	1	178	0	0	0	0	0	0	0	23	0
rs7164710	1	178	23	0	0	0	0	0	0	0	0
rs17374523	1	179	0	0	0	0	0	0	0	22	0
rs2073676	1	179	22	0	0	0	0	0	0	0	0
rs330340	1	179	0	0	0	22	0	0	0	0	0
rs6573853	1	180	0	0	0	0	0	0	21	0	0
rs969696	1	180	0	0	0	0	0	0	0	21	0
rs1034268	1	181	0	20	0	0	0	0	0	0	0
rs11114692	1	181	0	20	0	0	0	0	0	0	0
rs12519312	1	181	0	20	0	0	0	0	0	0	0
rs12560757	1	181	0	0	0	20	0	0	0	0	0
rs12900413	1	181	0	0	0	0	20	0	0	0	0
rs1561070	1	181	0	0	0	0	0	0	0	20	0
rs1959462	1	181	0	20	0	0	0	0	0	0	0
rs4437002	1	181	0	20	0	0	0	0	0	0	0
rs8100664	1	181	0	20	0	0	0	0	0	0	0
rs1539206	1	182	0	0	0	19	0	0	0	0	0
rs16963185	1	182	0	0	0	0	0	0	0	19	0
rs4725617	1	182	0	0	0	0	0	0	0	19	0
rs12711768	1	183	0	0	0	0	0	0	18	0	0
rs7683046	1	183	0	0	0	0	18	0	0	0	0
rs1329245	1	184	0	0	0	0	0	0	0	17	0
rs1484735	1	184	0	0	0	0	0	0	17	0	0
rs1567836	1	184	0	0	0	17	0	0	0	0	0
rs7224488	1	184	17	0	0	0	0	0	0	0	0
rs17772847	1	185	16	0	0	0	0	0	0	0	0
rs2053864	1	185	0	0	0	0	16	0	0	0	0
rs2720736	1	185	0	0	0	0	0	0	0	16	0
rs6415270	1	185	0	0	0	0	0	0	16	0	0
rs9873769	1	186	0	0	0	0	0	0	0	15	0
rs1425416	1	187	14	0	0	0	0	0	0	0	0
rs7823098	1	187	0	0	0	14	0	0	0	0	0
rs10521057	1	188	13	0	0	0	0	0	0	0	0
rs12370213	1	188	0	0	0	0	13	0	0	0	0
rs1733805	1	188	0	0	0	13	0	0	0	0	0
rs17806523	1	189	12	0	0	0	0	0	0	0	0
rs1872514	1	189	0	0	0	12	0	0	0	0	0
rs7818391	1	189	0	0	0	0	12	0	0	0	0
rs1041883	1	190	0	0	11	0	0	0	0	0	0
rs10516339	1	190	0	0	11	0	0	0	0	0	0
rs10741730	1	190	0	0	0	0	0	0	11	0	0
rs10931278	1	190	0	0	11	0	0	0	0	0	0
rs11973288	1	190	0	0	11	0	0	0	0	0	0
rs1572349	1	190	0	11	0	0	0	0	0	0	0
rs16886414	1	190	0	0	0	0	0	0	0	11	0
rs17564885	1	190	0	0	11	0	0	0	0	0	0
rs1847118	1	190	0	11	0	0	0	0	0	0	0
rs1920480	1	190	0	11	0	0	0	0	0	0	0
rs3824339	1	190	0	11	0	0	0	0	0	0	0
rs4568278	1	190	0	0	11	0	0	0	0	0	0
rs4783387	1	190	0	0	11	0	0	0	0	0	0
rs523907	1	190	0	11	0	0	0	0	0	0	0
rs538938	1	190	0	0	11	0	0	0	0	0	0
rs544443	1	190	0	0	11	0	0	0	0	0	0
rs670052	1	190	0	0	11	0	0	0	0	0	0
rs7796078	1	190	0	11	0	0	0	0	0	0	0
rs9545030	1	190	0	0	11	0	0	0	0	0	0
rs9637846	1	190	0	0	11	0	0	0	0	0	0
rs10487616	1	191	0	0	0	0	0	0	0	10	0
rs7689418	1	191	0	0	0	10	0	0	0	0	0
rs1931549	1	192	0	0	0	0	0	0	9	0	0
rs2068966	1	193	8	0	0	0	0	0	0	0	0
rs4688121	1	193	0	0	0	0	0	0	0	8	0
rs6534907	1	193	0	0	0	0	8	0	0	0	0
rs10253016	1	194	0	0	0	0	0	7	0	0	0
rs10496176	1	194	0	0	0	7	0	0	0	0	0
rs10513630	1	194	0	0	0	0	0	0	0	7	0
rs10759332	1	194	0	0	0	0	7	0	0	0	0
rs10745253	1	195	0	0	0	0	0	0	0	6	0
rs11995882	1	195	6	0	0	0	0	0	0	0	0
rs34263	1	195	0	0	0	0	0	0	0	0	6
rs1466828	1	196	0	0	0	0	5	0	0	0	0
rs1875238	1	196	5	0	0	0	0	0	0	0	0
rs6729152	1	196	0	0	0	0	0	0	0	5	0
rs1541335	1	197	4	0	0	0	0	0	0	0	0
rs875125	1	197	0	0	0	0	0	0	4	0	0
rs9671539	1	197	0	0	0	0	0	0	0	4	0
rs2061049	1	198	0	0	0	0	0	0	3	0	0
rs2692938	1	198	0	0	0	3	0	0	0	0	0
rs2729376	1	198	3	0	0	0	0	0	0	0	0
rs7359820	1	198	0	0	0	0	0	0	0	3	0
rs9318729	1	198	0	0	0	0	0	3	0	0	0
rs10239261	1	199	2	0	0	0	0	0	0	0	0
rs10866655	1	199	0	0	0	0	0	0	0	0	2
rs1700654	1	199	0	0	0	0	2	0	0	0	0
rs2073925	1	199	0	0	0	0	0	0	0	2	0
rs3744075	1	199	0	0	0	2	0	0	0	0	0
rs444394	1	200	0	0	0	1	0	0	0	0	0
rs517130	1	200	0	0	0	0	0	0	1	0	0
rs893763	1	200	0	0	0	0	0	0	0	1	0
